# Supplementary figures and images for: Enhancing effect of targeted intestinal delivery of Alhagi honey Polysaccharide-Alum Pickering emulsion adjuvant on the immune response to the BVDV vaccine in cattle
Source: Research Square preprint supplement (doi:10.21203/rs.3.rs-8142640/v1), 2025-12-16

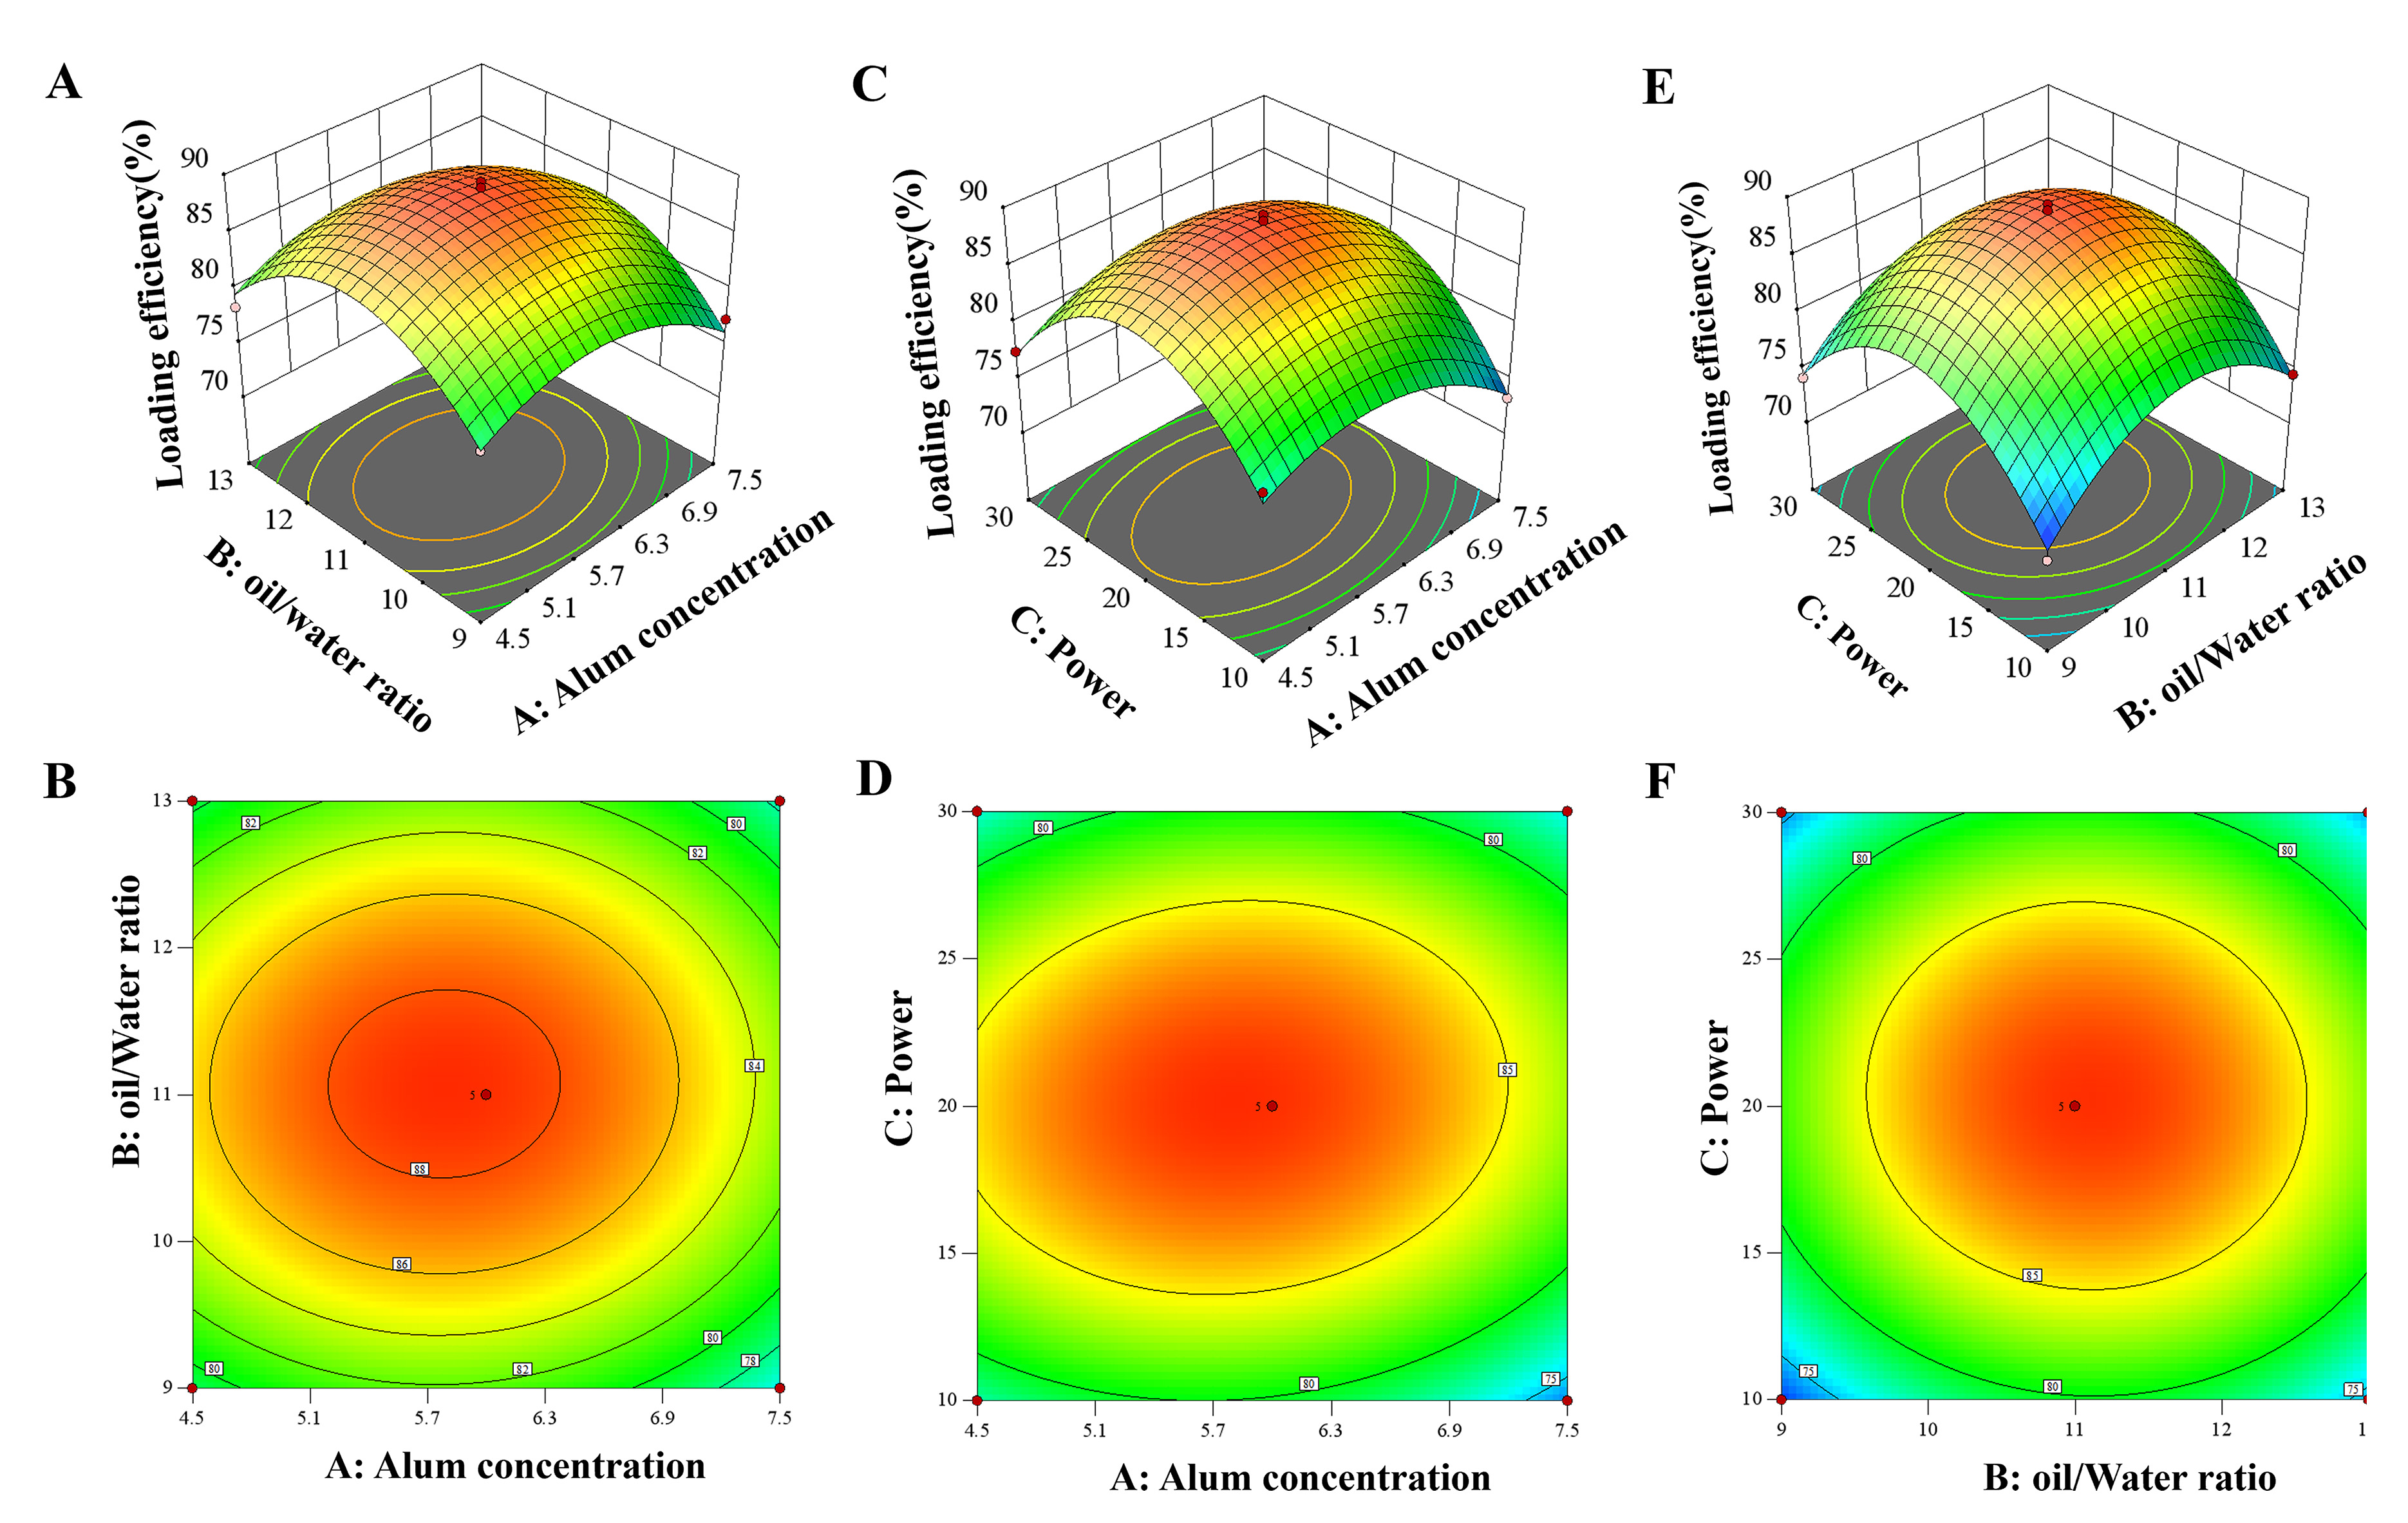


**Figure S1**. Response surface (A.C.E) of Y=f(A,B, C) and contour (B.D.F)

Supplement: Supplementary file 1 [file c2cca3bb9c8ab62d9df38597.docx]
